# Supplementary material
Source: PubMed Central journal article supplement (PMC5484524)
Supplement: NIHMS818450-supplement-6.pdf [file NIHMS818450-supplement-6.pdf]

## Supplemental Tables

**Table S1. Genome sequence data used in the study, Related to Figure 1**

| common name          | assembly           | class          | family            | species                            |
|----------------------|--------------------|----------------|-------------------|------------------------------------|
| Human                | hg19<br>(UCSC)     | Mammalia       | Hominidae         | <i>Homo sapiens</i>                |
| mouse                | mm9<br>(UCSC)      | Mammalia       | Muridae           | <i>Mus musculus</i>                |
| cow                  | bosTau7<br>(UCSC)  | Mammalia       | Bovidae           | <i>Bos taurus</i>                  |
| dolphin              | turTru2<br>(UCSC)  | Mammalia       | Delphinidae       | <i>Tursiops truncatus</i>          |
| horse                | equCab2<br>(UCSC)  | Mammalia       | Equidae           | <i>Equus caballus</i>              |
| megabat              | pteVam1<br>(UCSC)  | Mammalia       | Pteropodidae      | <i>Pteropus vampyrus</i>           |
| sloth                | choHof14<br>(UCSC) | Mammalia       | Megalonychidae    | <i>Choloepus hoffmanni</i>         |
| platypus             | ornAna1<br>(UCSC)  | Mammalia       | Ornithorhynchidae | <i>Ornithorhynchus anatinus</i>    |
| chicken              | galGal4<br>(UCSC)  | Aves           | Phasianidae       | <i>Gallus gallus</i>               |
| lizard               | anoCar2<br>(UCSC)  | Reptilia       | Iguanidae         | <i>Anolis carolinensis</i>         |
| boa constrictor*     | NA                 | Reptilia       | Boidae            | <i>Boa constrictor constrictor</i> |
| corn snake           | JTLQ01<br>(NCBI)   | Reptilia       | Colubridae        | <i>Pantherophis guttatus</i>       |
| king cobra           | AZIM01<br>(NCBI)   | Reptilia       | Elapidae          | <i>Ophiophagus hannah</i>          |
| Burmese python       | AEQU02<br>(NCBI)   | Reptilia       | Pythonidae        | <i>Python molurus bivittatus</i>   |
| speckled rattlesnake | JPMF01<br>(NCBI)   | Reptilia       | Viperidae         | <i>Crotalus mitchellii pyrrhus</i> |
| viper                | JTGP01<br>(NCBI)   | Reptilia       | Viperidae         | <i>Vipera berus berus</i>          |
| coelacanth           | latCha1<br>(NCBI)  | Sarcopterygii  | Coelacanthidae    | <i>Latimeria chalumnae</i>         |
| elephant shark       | calMil1<br>(NCBI)  | Chondrichthyes | Callorhynchidae   | <i>Callorhynchus milii</i>         |

**Table S2. Orthologous ZRS sequences used for lacZ transgenic reporters, Related to**

**Figure 2**

| Vertebrate | Coordinates (Assembly/Contig)          | Length | ZRS sequence (transgenics)                                                                                                                                                                                                                                                                                                                                                                                                                                                                                                                                                                                                                                                                                                                                                    |
|------------|----------------------------------------|--------|-------------------------------------------------------------------------------------------------------------------------------------------------------------------------------------------------------------------------------------------------------------------------------------------------------------------------------------------------------------------------------------------------------------------------------------------------------------------------------------------------------------------------------------------------------------------------------------------------------------------------------------------------------------------------------------------------------------------------------------------------------------------------------|
| human      | chr7:156,791,087-156,791,875 (hg38)    | 789    | aactttaatgctatgtttgatttgaagtcataagataaaaggtaacataagcaacatcctgaccaattatccaaccatcagacatccctgaatggccagagcgtgacacaggtctgtaggattaagaggtaactcctaactcaaacaaagtgcctgataataaaagcaaaaagtacaaaatttaggtaactccttcttaalttaattggactgaccagggtggaagcgaaagctgtgtgctgctgctggaatgctataaaagctgagcaacatgacagcacaatagaggaggaacaaagatTTTTAATATGTTCTATCCTGTGTCACAGTTGAAATTGCTCTGTTATGTCCTTTGGCAAACCTACATAAAAGTGACTGTACTGTATTTAGCCAGATGACTTTCCCCCAGTGGCTAATTTGATCAGGCTCATCTAAAGAGACAGAGTGTAGTGAAGTCCAGCTGTCCACGAGCTTCACTGCTTCTCATTCTTCAATTTTCTGCTGTTTTGCCACTGATGATCCATAAATGTTGAAATGAGTGATAAGGAAGTCTGCTGTTAGTGGCACATGCGCATATTTGGCTGGTTCTGGTGGTGGAGGAAATCACAGAAAAAGGGAAGCCCTGCTGGGAACCTGCAAGGAAATTAACCTGGGTCATGTTGATCTAGTGTATTACAGAAAAGCAATCTCACTAATGTTACGTGTTAATTTGATTTCC                                |
| cow        | chr4:119,026,017-119,026,791 (bosTau8) | 775    | cacallaatgctcttattgatttgaagttgtggcatalaaaatttaacataaagtgacagcaacatcctgaccaattaccgaa gccatccagacatcccaaatgccaagaacatagcacacggctgtaggattaagagggttaactcctgaactcaaac aaagtctgtgataataaaagcagaaggcaaaaactgaggtaactccttcttaalttaattagactgcccagggtgga agcgaagagctgggtgctgctgctgcaagcctataaaagctgagcaccgtgacagcacaatgaggaggaaagac acatccttaaatgtttctatcctgtgtcacagttgaaattgctctggtttatgtccctttggcaactcacaataaagt acctgtactgtattatgaccagatgacttttccccagtggttaattgtatcaggcctcatctaaaaagacacag aaatgagtaggaagtcatttcttatttttctctgttttggcactgtgatcctataaattgtggaatgag tgaatgaggaagtgctgtctgtgtgtagtggcacatgcgcatatggcctggttttgggtgagagaaatcacatg caaaaagggaagctcctgctggggaccttcaaggaaattacctgggctcgtttgatctgggtttatfacagaaa atggagtcatactcactgactattgtatgttattgatttcc                     |
| dolphin    | JH482689:127,180-127,973 (turTru2)     | 794    | cacgtaatgctgcttgggttgaagtcaggtataacatttaacataaagtgacagcaacatcctgaccaattacttaa gccatccagacacccccagatgccaagaacatagcacacggctgtaggattaagagggttaactcctgaactcaaac gaagtctgtgataataaaagcaaaaagtacaaaactgagggtgactccttcttaalttaattagactgcccagggtgga agccaagactgggtgctgctgctgcaagcctataaaagctgagcaccgtgacagcagcgtgagaggagcagcac atcgtctaatgtttctctgtgtcacagttgaaattgctctggtttatgtccctttggcaactcacaataaagtgaa cctgtactgtattatgaccagatgacttttccccagtggttaattgtatcaggcctcatctaaagagacacaga aatgagtaggaagtcagctcctcagtgacttcaattgctcttcttcaattttgctcgttttgcactgactcatcc ataaaattgtggaatgagtgattaaggaagtgctgtctgtttagtggcacatgcgcatatttggcatttttgggt ggtagaggaatcacatacaaaaagggaactcctgctgggaaccttcagggaatctacctgggtctcgttttga tctgggtttattacagaaaatggagtcatactcactaactattgtatgttattgatttcc |
| horse      | chr4:107,195,939-107,196,731 (equCab2) | 793    | caccttaatgctcttattgatttgaagtcataaagtttaacataaagtgacagcaacatcctgaccaattactcaaac catccagacatcccaaatgccaagaacatagcacacggctgtaggattaagagggttaactcctataactcaaacga agtctgtgataataaaagcaaaaagtacaaaattgaggtaactccttcttaalttaattagactgaccagggtggaagc gaagcgtcgggtgctgctgctgagcctataaaagctgagcaccgtgacgcaacatagaggaggaaagagagat tgccttaaatgtctctctgtgtcacagttgaaattgctctggtttatgtccctttggcaactcacaataaagtgact tgtactgtattatgaccagatgacttttccccagtggttaattgtatcaggcctccatctaaagagacagaaaa taagtaggaagtcagctcctcagtgacttcaattgctcttcttcaattttgctcgttttggcactgatccata aattgttggaaatgagtgattaaggaagtgctgtctgtttagtggcacatgcgcatatggcagtttttgggtg agaggaatcacgtacaaaagggaactcctgctgggaaccttcaaggaaattacctgggtcgtgctgtttagatc tctttatagcagaaaatggagtcatactcactaactattgtatgttattgatttcc       |
| megabat    | scaffold_14169:22,041-22,832 (pteVam1) | 792    | caccttaatgctcttattgatttgaagtcataaagtttaacataaagtgacagcaacatcctgaccaattactccaa accatgacagacatcccaaacgtccaagaacatagcacacggctgtaggattaagagggttaactcctataactcaaac gaagtctgtgataataaaagcaaaaagtacaaaattgaggtaactccttcttaalttaattagactgaccagggtgga gcaagggctcgggtgctgctgctggcgggtccataaaagctgaggaccgtgacagcagcaggaggagcagcga aagattttctatgtccctcctgtgtcacagttgaaattgctctggtttatgtccctttggcaactcacaataaagtg aacctgtactgtattatgaccagatgacttttccccagtggttaattgtatcaggcctcatctaaagagatgacg aaacgagaaggaagtcagcccgctcagtcagcttcaattgctcttcttcaattttgctcgttttggcactgatca tccataaattgtggaatgagtgattaaggaagtgctgtttagtggcacatgcgcatatggcagtttttgggtg ggccagaggaatcacagcagaaaaggaaagaccctgctgggagccttcaggggactcaccagggtcgcgttt ttagctctgtttatcagaaaatggagtcatactcactaactattgtatgttattgatttcc |
| mouse      | chr5:29,314,881-29,315,667 (mm10)      | 787    | tactttaatgctcttattgatttgaagtcctggcatalaaaacttaacataaagtgacagcaacatcctgaccaattactcaaac catccagcactcagtagtccaagaacctcacatgatcataggaatgaagagggttagctctgtaactcaaacaaa gatttcaataaaagtaaaatgcaaaaactgaggtaactcctctcttaattagttgactgaccagggtggagggc gaagcacttctgctggctcagctgtccataaaagcaacaagacacagcacaatagaggaggaaactaagatcgt ttaatatgtttctatcctgtgtcacagttgagatgtctctggtttatgtcctttggcaactcacaataaagtgactgt actgtattatgaccagatgactttccccctcagtggttaattgtctcaggcctcatctaaagagaaagagtagga agtcagcctgggactcagtagcgttcaattggatttcaatttttctgttttttggcactgatgacataaattg ttgaaatgagcagatcaggaagtgctgttagtggcaaaagcgcacaaactcagctggttctgtcgtgggtgaaa ggaaatcacaggcaagaggagcctcctgctgggaaccttcaaggaaattgactgggcatgtttgatctggca tttatfacagaaaatgaagtcatactcactaactgttctatgttattgatttcc       |

|                |                                       |      |                                                                                                                                                                                                                                                                                                                                                                                                                                                                                                                                                                                                                                                                                                                                                                                                                                                                                                                                                                                                                                                                                                                                                                                                                                                                                                                                                                                   |
|----------------|---------------------------------------|------|-----------------------------------------------------------------------------------------------------------------------------------------------------------------------------------------------------------------------------------------------------------------------------------------------------------------------------------------------------------------------------------------------------------------------------------------------------------------------------------------------------------------------------------------------------------------------------------------------------------------------------------------------------------------------------------------------------------------------------------------------------------------------------------------------------------------------------------------------------------------------------------------------------------------------------------------------------------------------------------------------------------------------------------------------------------------------------------------------------------------------------------------------------------------------------------------------------------------------------------------------------------------------------------------------------------------------------------------------------------------------------------|
| platypus       | Ultra274:11866440-11867247 (ornAna1)  | 808  | cacctttatgccaactttgtattggaagtcacggcataaaagtttaacatgagcgacagcaacatcctgaccaaltatcaaaatccagacatcccaaaatggtcagaacacaacacagctctgtaggattaagagggttaactctagaacatcaaaagagtgctgataataaaagcaaatagtaaaaaattgaggtaactctctgcttaaltataggttagaccagggtggaagfgaagaggcctgggctgggctggaatgctataaagctgagcaacatgacagcaaatggaggaggaacaaaagatttttaaatatgctctctctgtgacagttgaaattgctcgtttatgtccctttggcaactacataaaagtgaccctgtactgtattatgaccagatgacttttttccccagtgctaaattgtatcaggccccacttaaaagagacagcaacagagtaggaagctaaagcctgtttgcccagtgagcttcaattgctcttttcaatttttggcactgacatccataaattgtggaataaagtgatlaaggaagtagctgttagtgtagggcacatgacacatcctaaaggatggtttgtgggtagaggaatcgcgtacaaaaaggaaaactcctgctgggaactttcaaggaattcaactgtcaaatgtttgatcttgggtttattacagaaaatagagtaatttaccagcattgttatgtgtagttcatttagtctccct                                                                                                                                                                                                                                                                                                                                                                                                                                                                                                                                                                                                       |
| sloth          | scaffold_55345:9,280-10,085 (choHof1) | 806  | cacctttatcctgtcttattgaggctagggcataaaaatttaacataagtgagcaacatcctgaccaattatccaaatccacagacatcccaaaatggtcagaacataacacatggtctgtaggattaagagggttaactcttaactcaaaacaaagtgcttaataaaagcaaaagtaaaaaattgaggtaactctcttaattagttagtagcaccagggtggaagcgaagcgttctgtgctgtgcttgcataatctataaagctgagcaacatgacagcaacatagaggaggaaacaaagattgttttaalatgttctactctgtgacagttgaaattgctcgtttatgtccctttggcaactacataaaagtgactgtactgtattttatgaccagatgactttcccccccagcagtaattgtatcaggcctcaactaaaggagacagaaagtaggaagccaagccttctgtcagtagcttcaattgctctttcaatttttggcctgtatccataaattgtggaatgagtgatlaaggaagctgcttagtgtagtgacatgacatattggcctgtttgtgtaggagagaaatcacatacaaaaaggaaaactcctgctgggaactttcaaggaatttagctgggcatgtttgacttgggtttattacagaaaatggagctatctcaactaattgttaccatggtatagtaattgtatt                                                                                                                                                                                                                                                                                                                                                                                                                                                                                                                                                                                                                                  |
| chicken        | chr2:8,466,963-8,467,772 (galGal4)    | 810  | taccttaactgatcttgaactcgaagtcacggcataaaagtttaacatgagcgacagcaacatcctgaccaattatccaaatccagacatcccaaaatggtcagaacacaacacagagctctgggattaagagggttaactcctggaacatcaaaagtagtcatgataaaaaaaatagtaaaaaattgaggtaactctcttaattataggttagaccagggtggaaagcgaagggccagagctgggtcagaatgctataaagctgagcaacatgacagcaaatggaggaggaacaagaatttttaataatctctctgtgacagttgaaattgctcgtttatgtccctttggcaactacataaaagtgaccctgtactgtattatgaccagatgacttttccccagtgctaaattgtatcagaccctcaactaaagacacagaaagtagtaggaagccaacaggttctcaatgagcttcaatgactcttcaatttttggcctgtatccataaattgtggaatgagtgatlaaggaagctgcttagtgtagggcacatgacacatcctggtatgtttgtgggtagagaaatcgcgtactgcacaaacaaaaggaaactcctgctgggaactttcaaggaatttaactgcataaattgttactgtggtttattacagaaaatagagtaatttaccagcattgttatgtgtagctaggcctcc                                                                                                                                                                                                                                                                                                                                                                                                                                                                                                                                                                                                                                   |
| coelacanth     | JH127332:523497-524100 (latCha1)      | 604  | caacatcctgagcaatagtgaaatcaccagcgtgcacacacatcagcacaagcgagagctcagcagatttagaggtgaaactcctaaacatcaaaaggaatgctgataaaaaaatcctgtaacaaaattgaggtaactcctctgcttaataatagatagaccagggtggaagcgaagggctggctgtggctcaaaatgctataaagccaagtgcaatgacagcaacatagatgaggacaacaaagatttttaatacgtctctacagttgaaagttgactggtttatgtcccttttggcaactacataaaagtgaccctgtactgtattatgaccagatgacttttctgtggcctaaattgtatcaggctccataataaaggacacagaaatggtaggaagtgcaagcctgttggctcagttcctcaatcctctcgggttggctgtgtttgctactgatcacaataattgtggaatgagtgatlaaggaagctgcttagtgtagtgcaatgcatgtctcggtatggttttgggtagaggaataca                                                                                                                                                                                                                                                                                                                                                                                                                                                                                                                                                                                                                                                                                                                                                                                                                  |
| elephant shark | KI636064:431,743-433,259 (calMil1)    | 1517 | atttaaaatgcatctggacttctgtgactggactcctctgctgtctgtttgtgacaggcagaagttatgattgataaaacagacgtcaggttatttcaacagacggcttttaaaatgaaactgaggtttgagctgctctgtatgactcgtctactctatagcaaatgtcgtgaaatcaaaaaatccttgccttcaagtaaaagctttgatgttttatttggctgggtgtaaaagacactcggagacgaatgaaagtgaggaaactgcatcctgattgagtcggtttggcagcgtgtaaaggttagccttcaatctgttctgactctaacggtagaccctcctcagactctcccgaataaatgatataaaaaattctgttttaaaagtattgacagagtcagcagttatcccgctagtgagaatacaaaataaaatcgaagcctaaccaatacagaacagagtgctgtcatgacatttctgatacaaacctggaataaactgagagtgatattaccacatgttcatcaaaacagtcacatgacatcctcaacaaatcccaattatccagacattcaaaacatgaaactcaatgtagcagctgtaggtttagagacttcaactgaaacgttaaaaaagcttataaaagagagcagatgaaattgacgttattctgactaaatagatccacagatggaagtgagagccaataatggctcctcaaaatgctataaacagcaaaaagacagcaaatggatgagaaaaaagatttttaatacactcaactcctgtgacagttgagattgctctgttttggcaaaactacataaaactgacatgactgtatttaccagcagatgactttttttagtgccccattgaaattgtatcaggccatataaagagactcagaaatcggtaggaagtagaagctgcttggcagattgtttcattgacttttttaactgttttttccccctgtgatgccataaattgttggaaaagactgttacggaagcacttggtagtagcagctgcatatttctgttcaatttggcagtgaggagatgatgtaaacatattgaaagcctggaggaggagcttctcaggaaaaggagctctgttgaattcgggctgacgttcaatttggaaaagattcgggtttaaattgttggagaacttctgaaagttactctttaaataatgataccgttttagttaaatacaatgtagtaggagacttccagcctcctgaaactcgcgaatcagtgaaatgtcaggagtagtgcaaatgtcagaagcttggcctgaactttttagatttataataat |
| lizard         | chr6:6,319,449-6,320,269 (anoCar2)    | 821  | ttcatttaattgatttttggttctcctagcataaaatttactatgtgacagcaacatcctgaccaattatgcaagc atccagacatttcaaggttggaaacaccagaaaaagctgtgattaaagagggttaactcctgcttaattataggttagccaggtggaaagtagagagctgtgctgtaagatctataaagctgaactatagacagcaacatggaggaggaacaaaga ttgttaataactctactcctgtgacagttgaaattgctcgtttatgtccctttggcaaacatacaaaaagtgacc atgtagtattttatgaccagatgactttccccctgtagtaattgtatcaggccccaaataaaagacacccg attagtaggaagctaaaccagtagtttcaaggagcctcagggcattcttcaatttttggcactgtc atccataaattgttgggaataagtgatgaggaagtgctcttagtgtagggcacatgagtttgggtgaggtctt ttgtgggtgaaagaaatcaagctgtgcaaacataaaggaaatcctgctgggaactttcaaggaatttaact tgcataaattgtactgtgttctcaaaaaatagagcaatattcattagctgttggtagtcaagtaataccccat catcagct                                                                                                                                                                                                                                                                                                                                                                                                                                                                                                                                                                                                                                                                             |

|                              |                                                                                              |     |                                                                                                                                                                                                                                                                                                                                                                                                                                                                                                                                                                                                                                                                                                                                                                                                                                |
|------------------------------|----------------------------------------------------------------------------------------------|-----|--------------------------------------------------------------------------------------------------------------------------------------------------------------------------------------------------------------------------------------------------------------------------------------------------------------------------------------------------------------------------------------------------------------------------------------------------------------------------------------------------------------------------------------------------------------------------------------------------------------------------------------------------------------------------------------------------------------------------------------------------------------------------------------------------------------------------------|
| boa constrictor              | NA                                                                                           | 783 | gctatataagcatalactgttatalgatgggaagactggacaagttctatggaaftttacaaccagttgtgcaaa<br>gcatccagacatctctgtttggcatccagtcgagaagctgtggatlgagagtttaaccaagaacatacaaaagagaat<br>gcttgataataaaagcaaatgtagcaaaaatttaataatagtagggcagggtggaagtgaagaggccagctctat<br>aaagctgagcaacatgacagcaacaatggaggaggacaacagctgttttaataactctatctgctcaacgttgaa<br>attgctctggtttatgtccctttggcaactacataaaagtactgtgtactgtattttatgaccagatgactgtccct<br>ttctggtaattgtatcaggccccagattaaagagacacagaatgagtaggaagccaaagcaaatgtctca<br>ggacagttcattgcaattctgattaggtttgctgtttttgccatgatccataaattgctggaataagtattaa<br>gaagtgctcttagttagtgacacatagatgttctgtaaacgtttttgtgagtgaaaggcaatcagatattgag<br>aaacaaaagggaatcctgctggagctttcaaggaaattactgcaatgtttgatcttaattgtttgttaca<br>aaacatacagcagatattaccaggtgctgtgtcaagtaataaccctactg                                               |
| Burmese python               | 13056-13925<br>(Python_molurus_bivittatus-5.0.2-2355.6;<br>Genebank ID<br>AEQU02119490.1)    | 792 | gctatataacataactgttatgtgatgggaagactgacaagttctatggaaftttgaaaccaattgtgcaa<br>agcatccagacatcttagtggcaccatgacagaagctgtggatlgagagcttaaccaagaacatacaaaaga<br>gaatgcttgataataaaagcaaatgtagcaaaaatttaataatagtagggcagggtggaagtgaagaggccct<br>ctataaagctgtaaaagctgacacagcaacaatggaggaggacaacagatttttaataactctatctgctc<br>tcacagttgaaattgctggtttatgtccctttggcaactacataaaagtactgtgtactgtattttatgaccagat<br>gaacttccccctttctgctaatgttatcaggtccagatlaaagagacacagaacagtaggaaagctgcaaac<br>agtagtctgaggagcgtcattcattctttaggtttgctgtttttgccatgatccataaattgctggaat<br>aagtgataaaggagctgcttagttagtggcacatagacgttcatgtaacgtttttctgagtgaaaggaaat<br>cagatattgctgaagcaaaagggaatcctgctggagctttcatggaatlaactgcaatgtttgatctta<br>gtttgttacaacatacagcagatttaccaggtgctgtgtcaagtaataaccctactg                                                              |
| Burmese python (resurrected) | -                                                                                            | 809 | gctatataacataactgttatgtgatgggaagactgacaagttctatggaaftttgaaaccaattgtgcaa<br>agcatccagacatcttagtggcaccatgacagaagctgtggatlgagagcttaaccaagaacatacaaaaga<br>gaatgcttgataataaaagcaaatgtagcaaaaattctgaggaactctctgcttaataatagtagggcagggtg<br>aagtgaaaggccctctataaagctgtaaaagctgacacatgacagcaacaatggaggaggacaacagattgttt<br>aataactctatctgctcagattgaaattgctcgtttatgtccctttggcaactacataaaagtactgtgtac<br>tgtattttatgaccagatgacttccccctttctgctaatgttatcaggtccccagattaaagagacacagaacga<br>taggaagctgaaagcagtagtctcaggagcgtcattcattctttaggtttgctgtttttgccatgatc<br>cataaattgctggaataaagtgatlaaggaagtgcttagttagtgccacatagacgttcatggtgaaacgttttt<br>ctgagtgaaaggaaatcagatattgctgaagcaaaagggaatcctgctggagctttcatggaatlaactg<br>cataatgtttgatcttaattgtttacaacatacagcagatttaccaggtgctgtgtcaagtaataaccctactg                                      |
| speckled rattlesnake         | 3119-4036 (Crotalus mitchellii pyrrhus<br>CMI_contig_3799;<br>Genebank ID<br>JPMF01003770.1) | 836 | tactcagtggaataactctggtatcagagcttaaccaagaacatacaaaaggagcttaataaaggacataaatt<br>ctaacattgcatgggtgagtgagtgtagaalgcaaatgcaagatgacagcagttcagattctgactgctcaag<br>gttgactcagcttccatcttcaagctcagtaaaagtaggacccaagctaaagctgctgctggtctaaaccatt<br>agctaaataaagcaaatgtagcaatttcttaataatagtagccagatgctcagctggaagctgaaacaacatgacag<br>cacaatggaagaagagcacacattgttttaataactctatctgttttaacattcaaatgtctaatttatgtccctttg<br>gcaacttaataaaagtagctgactgattgtttgtatcagatgactttgcccccttttagctaaattatcagggcctca<br>ttagtaaaagacagaaaaaagtaggaagcaaaagcaataggctcaaggacactcattgctccttatttagg<br>gcttcttattttggccactgacaattataaattgctggaataagtgatlaaggaagtggtgttttagttagtggg<br>acatagatgttctggtgagcctttttgtgaaaggaacagatactggaagaaggaatcctgctggg<br>aactttcaaggaattagcctacataatgtttgatcttaattgtttacaacatacagcagattttaccagattc<br>tgtatgcaactaaccctactg |
| king cobra                   | 589764-590624<br>(Ophiophagus hannah<br>scaffold183.1;<br>Genebank ID<br>AZIM01000183.1)     | 783 | tgaacggaataatactctactcatgttctcccaacaacaggagtcaggcagttgatagtagcaagtaataaaga<br>gactttgtagtgaatagatcaggtaggtagatgcaaatccctgtatctgaaattgacccccgggataaattggagg<br>tactagttgattcagataactctgacttaatgaccacaattgagccaaaactcctggtttatgtctttggcaact<br>talataaaagtagctcactatattatgatcagatgagtttaactccccctttatagctgtagcaggccctactatlaag<br>agcagaaaaaacagtaagaatacaaaagaaatgtctcaatgacgtctcattcctcattagggtgcttaat<br>gtctatggagattcagtcacaggctcaggtgttcccaaaagtgcttttcaataggcaactgagctgtttttctctg<br>aagtcgttctcttcaagaagcttcaatttttgccttgacaatccataaattgctgaaataaaggaatlaagga<br>agtgctgcttagttagtgacacatagatgttcatctgtgaaaggaatagatattggagaacaaaaacga<br>agaatcctgctggagttttccaggaatttagcctgacataattttgatcttaattgtttacaagaatcagcagct<br>attgttacaacaaagcaaggtgctgtatgcaattataaccctactg                                                  |

**Table S3. Extended orthologous ZRS sequences and homology arms used for knock-in experiments, Related to Figure 3**

| Vertebrate     | Coordinates (Assembly/Contig)                                                      | Length | Swapped sequence                                                                                                                                                                                                                                                                                                                                                                                                                                                                                                                                                                                                                                                                                                                                                                                                                                                                                                                                                                                                                                                                                                                                                                                                                                                                                         |
|----------------|------------------------------------------------------------------------------------|--------|----------------------------------------------------------------------------------------------------------------------------------------------------------------------------------------------------------------------------------------------------------------------------------------------------------------------------------------------------------------------------------------------------------------------------------------------------------------------------------------------------------------------------------------------------------------------------------------------------------------------------------------------------------------------------------------------------------------------------------------------------------------------------------------------------------------------------------------------------------------------------------------------------------------------------------------------------------------------------------------------------------------------------------------------------------------------------------------------------------------------------------------------------------------------------------------------------------------------------------------------------------------------------------------------------------|
| human          | chr7:156,790,708-156,792,031 (hg38)                                                | 1324   | taacatctatttgaataaaaaatgfcaggaggaaaaaaatcagcaacttaagaaagtgaggagaaaatctccat<br>atgcttatttgaataaaatgatgacagalttaatacccaagaatcttctgggagtaaatcttcttcttcaactta<br>atgcttatttgaatgaagtcacagataaaaagtaacataagcaacatcctgaccaatcccaaacccagacat<br>ccctgaatggccagagcgtagcacagctctgtaggalttaagaggtaactctataactcaacaagtgctgata<br>ataaaagcaaaaagtaaaaaattaggtaactctcttaataaattggactgaccaggtaggaagcgaagagctg<br>tgctggctgggaatgctataaaagctgagcaacatgacagcaaatagaggaggaaacaagaatcttcttaatt<br>ctatctgtgacagcttgaatgctgctgttatgctctttggcaactacataaaagtgacctgtactgtatttat<br>gaccagatgactttccccccagtgctaatgctatgacgctcctcaatgaaagacacagagtgagtaggaagcc<br>agcctctgctccacagacttcaatgacttcttataatcttctgctgttttggcactgatgacataaaatgtagaa<br>agtgagtaaggaagtgctcttagtgtagtgacatgcatatggcctggtctgggggtagagagaaatc<br>acagacaaaagggaagccctctgaggacccctgcaagaaaatcttgggctatgctttgatctaggtttattac<br>agaaaaatgaagccatactcaactaactgttagctgttaattgatttcccaacacctcaagaaaaaaatcataga<br>gcaatttataagaactctcaactcccccaatgagagcactgatttactagaatggatgtaggaagcaatg<br>atttattgaaaaactctattctgataatgctgtgatactcagcttctttggaaatggttactgtaaggtgata<br>accatgtaagtagcattgaaactcaaatctggcgtagggaaactcagaagaataggaagtagattttgga<br>ggaaaagagtaaacatttatttcaataaaatcattagagggtataaaaaatggaatgaaatcatttagtcagg<br>aatgacataatgtgactgtt           |
| coelacanth     | JH127332:522,984-524,307 (latCha1)                                                 | 1324   | accacaacacataataaaatggtggtgatacatatagttgggcttaccagtttaaaaaaaagtgaaaatgatg<br>gaatataataatgtaattgtgtatgtaaaatagtttaalagggaaaaagacatttttagtcttcttcaataac<br>gacaactgtgtgtaaaaaatgtaacaggttactcagcaacatcctgagcaatgtagtaaatccacagacgctg<br>cacaaccaltcagcacaagcagagctgtaggatttaggagttgaaactcaaaacacaaaagggaagcctgat<br>aataaaaaatcagctgacaaaaatggagtaactcttccctaaatagatagaccaggtggaagcgaagagg<br>ctggctgctggctcaaaatgctataaagccaagtgccatgacagcaacaatagatgaggaacaaagattttataacg<br>cttctatctgtgacagttgaggtgctgctgtttatgctctttggcaactacataaaagtgacctgtactgtatt<br>tagaccagatgacttttctgctgctaaatgtagcagctcccatataaagggaacagaaaatggtaggaagtgca<br>agcctgtgtgctgactgctcattgacttctctcgtttgctgctgtgtgctgactgatcacaataatgttggaa<br>aatgagtgatgaagagtgctgcttagtgtagtgacatgcatgttctggtaggtttttggggtagagagaaat<br>catgtaactgtgcaaaagaaaggaagccctctgagaccccttgaagaaatgaacagagctggaaggtttgat<br>cttggttgctgcaagtaactcagtgtaatactgctgctaacagcaacttgggggctttgctgacagaaggttactt<br>agttggatttacctcaaatgataagatacagtaggtcaatctttgaaaagagaggttttttggtaggtttt<br>aaaaaaaaaaaaaaaaaaaaaaaaaaatctgtgctgtgaaaggtgctgattgtagaccaagcactgaa<br>atccttttatccacagaataggtagatgcatggacagtaacagtagcagactccccacattgccaacatgcttcaac<br>ctgtcaaaaagaaagagcttaagtagagccagcaatacactgaaaaagatttttccggggggggggg<br>gaactgctgttttaaaagattactatgctt |
| Burmese python | 12,740-14,063 (Python_molurus_bivittatus-5.0.2-2355.6; Genebank ID AEQU02119490.1) | 1324   | accattgtgctatcgtataaaaatggcatctgattggtgtagggcttagaagcaagaggagaagggactttga<br>ttgaagattgtttgtacctatactaggtattggccaaaaacaatgaaacgaatcagatttcttctctatagaac<br>caaaagcataagaatgctataaaacataactgtatgtaggggaagacctgaaacatcttatggaagtaatttg<br>aaaccaatgtgcaaaagcagacatcttaggtttggcaccatgcaagaagctgtaggattgagagcctaac<br>aagaacatcaaaagagaatgctgataaaaagcaaatgtagcgaattttaataatagtagggcaggtgga<br>agtgaaagagcccctctataaagctgtaaaagctgagcaacatgacagcaaatggaggaggaacaaagattgttta<br>atatactctatctgctcacagttgaaaatgctgctgttatgctctttggcaactacataaaagtgactgtgact<br>gtattttatgaccagatgactttccccctttctggcaatgtagcaggtcccagatataaagagacacagaacag<br>taggaagtcgaagcagtagtctcagagcgtctcattgacttctataggtttgctgttttggcactgatcatcc<br>ataaattgctgaaataagtgatgaagagctgcttagtgtagtgacatagacgttcaatgtagcgttttttc<br>tgagtgaaagaaatcagattgctgaagcaaaaaggaagacctgctggagctttcatggaatgaaactgca<br>ataatgttgacttaattgtttacaacacacagcagtagttaccaggtgctgctgcaagattatacctcatca<br>ctgctactttccacattgaaatcttaagatattttgttaaaaaatgaaactagttggccttacttcaatagcaagt<br>agttgctcaacagacataatggaagcacaatgcataaaaatagttagcatttcaaaaatgtaaaaactggtgga<br>gcaacaaggggctacttcaaatgacattttaaagctgccaatgaaactgcaaatgctgcttcaataatagataat<br>tggccaatctccccctgccccagcaggaagcctgctttagcagtgaaaggtattttgactagttttagc<br>attgtatattccgggtcctgctgctg    |

|                                     |                                                                                                                                           |             |                                                                                                                                                                                                                                                                                                                                                                                                                                                                                                                                                                                                                                                                                                                                                                                                                                                                                                                                                                                                                                                                                                                                                                                                                                                                                                                                                                                                                                                                                                                                                                                                                                                                                                                                                                                                                                                                                                                                                                                                                                                                                                                                                                                                                                                                                                                                                                                                                 |
|-------------------------------------|-------------------------------------------------------------------------------------------------------------------------------------------|-------------|-----------------------------------------------------------------------------------------------------------------------------------------------------------------------------------------------------------------------------------------------------------------------------------------------------------------------------------------------------------------------------------------------------------------------------------------------------------------------------------------------------------------------------------------------------------------------------------------------------------------------------------------------------------------------------------------------------------------------------------------------------------------------------------------------------------------------------------------------------------------------------------------------------------------------------------------------------------------------------------------------------------------------------------------------------------------------------------------------------------------------------------------------------------------------------------------------------------------------------------------------------------------------------------------------------------------------------------------------------------------------------------------------------------------------------------------------------------------------------------------------------------------------------------------------------------------------------------------------------------------------------------------------------------------------------------------------------------------------------------------------------------------------------------------------------------------------------------------------------------------------------------------------------------------------------------------------------------------------------------------------------------------------------------------------------------------------------------------------------------------------------------------------------------------------------------------------------------------------------------------------------------------------------------------------------------------------------------------------------------------------------------------------------------------|
| <p>Burmese python (resurrected)</p> | <p>-</p>                                                                                                                                  | <p>1341</p> | <p>accattggtctatcgtataaaatggcatctgattggtggtgtagggcttagaagcaagaggagaaggatcttga<br/>         tgaaggattttttgacctacactaggtattggcctaaacaaatgaaacccaatcagatttcttggcctatagaac<br/>         caaaagcataaagaatgctataatacaataactgtatgtgtaggggaagacgtgaacaagttctttaggaagtaattg<br/>         aaacccaattgtcaaaagcatccagacatcttagtggcaccatgcaagaagctgtggattgagagcttaacc<br/>         aagaacatcaaaagagaatgctgataataaaagcaaatggtagcgaatctgaggtaactcttctgcttaatta<br/>         ggtaggccagggtggaagtgaaggagccctctataaaagctgaaagctgagcaacatgacagcaaaatggaggag<br/>         gaacaagattgttataatactctatctgctcagcttgaatgctcctggtttatgtcccttggcaaacctacata<br/>         aaagtgactgtactgtatttatgaccagatgacttccccctttctggctaattgtatcaggctcccagatataaag<br/>         agacacagaacagtaggaaagcgaagcagatgctcctgaggagcctcattgcaacttcttaggtttgctgtt<br/>         ttggcaactgatcctataaattgctgaaataagtgalttaaggaagctgcttagtgttagtgccatagacgttca<br/>         tggtaacgctttttctgagtgaaaggaatcagatattgctgaagcaaaaggaagaalctctgctggagctttcat<br/>         ggaaatctaactgataatgtttgatcttaattgtttacaaaacatacagcagatttaccaggctgtgtgtgca<br/>         gtaattaccatcactgctatctttccacatgtaatttaagatattttgtaaaatgaaactgtaggcttactctt<br/>         aatgcaagtgaaagtgtcaacagacataattatgaaagcaaatgcaaaaatgagttagcaatttcaaaaatfat<br/>         caaacgtggtagcaacaaggggctactcaaatgacattttaaagctgcaatcaaacgtgctgctgctt<br/>         cataatagataatttggccaattctcccctgccccagcagaaagcctgctttagcagtgaaagatttttag<br/>         tttgacagttgtgactatgtatattccccgctgctgtgg</p>                                                                                                                                                                                                                                                                                                                                                                                                                                                                                                                                                                                                                                                                                                                                                                                                                                                                                                       |
| <p>king cobra</p>                   | <p>589,507-590,830<br/>         (Ophiophagus hannah<br/>         scaffold183.1;<br/>         Genebank ID<br/>         AZIM01000183.1)</p> | <p>1324</p> | <p>aaacagctgctactcaaaagcaacaataaacttactcagatacatttctactgtttgggaatgacttctgt<br/>         agaagttgagcaggagatgaatgggaagctttggatattttctcttacttcttcttctgctatagaat<br/>         gattttttcttcttgaaggggttctcaaaaagaacatgaggccatgctgaatataatttaaacacatttagtca<br/>         gtatagcattctgatgactattatactgaagcctcaaaataggacatgaagcgaatataatcttactcatgttccca<br/>         caacaggagtagcagctgtgatagtagcaggttaataagaagactttgtagtaagtagcagctaggtagat<br/>         gcaaatccctgtatcgaagttgacccgggataaattggaggtagtggtaactcagataactctgactaatga<br/>         ccacaaatgagcccaaaatctctggtttatgttcttggcaaacctataaaaagtagcactatattatgatcaga<br/>         ttagttaaactccctttatgctgtagtgcaggccctactataaagagacagaaacaagaatgaagaatcaaaaga<br/>         atagtctcaatgagcagctcattgctcctcattagggttcttaagtctatgagagattcagctcaccagctggtt<br/>         gtcccaaaagctttcaataggcaactggactttttttctgaagctgttctcttcaaaagactcaatt<br/>         ttgctgtgacaaatcctcaaaatgctgaaataaaggatgaagagtagctgcttagtgttagtgccatagatgtt<br/>         atctgtgaatgaaaggaatgataattggagaacaaaacgaagactcctgctggagtttccaggaaattg<br/>         cctgcalaataattgacttaattgtttacaaaagatacagcattcattttacaaaatgaaacaggtgctgtatgca<br/>         attataacccatcactgctatcttttctcactgaattctgaaatatttctgttaaaaatgaaactgttggcctatgtt<br/>         taatgcaagtgacagactgtgctgaatgatacattatgaatgataaacgctgcaaaaataggtagcattttaa<br/>         caaacctgtgacacgctactcacaatgcaaaaatcattttaaactgctgtaaacctgtaaaatgctcctca<br/>         taactgtgacaatt</p>                                                                                                                                                                                                                                                                                                                                                                                                                                                                                                                                                                                                                                                                                                                                                                                                                                                                                                                                              |
| <p>HA-L</p>                         | <p>chr5:29,315,821-<br/>         29,318,002 (mm10)</p>                                                                                    | <p>2182</p> | <p>gtgggttggagtagagtggtgccaagaatggtgtccaagaagcctgacttctgctgacaccaagaaga<br/>         gggaccagggaaggagatcaggggttcaatgggttataacatgagattacagcctgtgtctgtctactgtctc<br/>         tctgatgtgtctgtgactaaatgaggtaattatgtaaaagcagccttaggacttattacattccccctctttt<br/>         ttctgtttcaaacattatataatatttagacctgcaattataaggagaatagtagggagatggcctaagaaa<br/>         atagcagctccacatgtaaaagacagatggcgtgcaagatgattcagctgtgctgcaagcagtagactaaag<br/>         gtagtctcagaaccatagtagaaggagagaactgactcctgcaagttgctcagtgctccatgtgtccctgtg<br/>         cacaggctctcccccccccaacaagaacaaatagatattcaatataaaataaaagagagatgaaagagcct<br/>         gaaaaggacactgaaagcctggagacctaagtgctgtgtgtgtagcacagtgatttaataagatgtgtgtagt<br/>         tgtgaatgactgtgcaatgagcatgtgatcgaagcactggccagctcctgagtaatgtagcagattacaggctc<br/>         acattcaaaatatttctgacttgaagtagagtagtagaagcaaaacagcagtttaagcatttaggggtgtcact<br/>         cttgacaaaagctactggaaggtgaggtgtgtacagagcclacagaatggtttcagattaagtggtcaatgttatt<br/>         taaagtgcagcatalatattcagttttaaactcagttacaggaagcctcaaaaggggtgtagcattgtacaataat<br/>         atactctcagtgctgaaatcgtgtgacatgactcctggggctactgcaagcagttcaggtttctccagca<br/>         gcagcagctctggctctgtgctatattagaacagtgaaactatactatagggctgctcctgtgtgtgtggtga<br/>         ctgagctacacagttttcaaaagatggctgatgagtagctgctgtagtctcctgctgactgttctgattga<br/>         ctctcagggcagatctgttctgactaactggagagagtagaaacttcttagtgaaggtlaccagtagactga<br/>         gtcagcaaacacagctgctgatttccattccccctgtagaccctcctgggggttttactgagttacatct<br/>         ggtatattctaaagtgccacatggctccatgcatctaggttccctgggcaatgattttaaacaagcctcctgca<br/>         ttgtcagagatgtgaaatggctactggctgagatgaatgacagctgaattgaaactcagcgaagcagaat<br/>         tctctactacagctgttattcaaataggacatttaggcctagagagctgctcactctcaagggcgttaagtag<br/>         cttttctacatgggggtgagttctttcttaggacatctagcattttttttaaagtcaatcaagataagaga<br/>         acatagtttgaagtgaaaagtgttttttaataagtaagaagctgtctttgtgtgaggatttactcctgctgtag<br/>         tggagttcttaggtgatactattgtgacagcactcactgctgctatagcagctggggctgtgtgttgaacatgat<br/>         ttgtctgctgattcaactgattgaaatgccatgctgccatgattgtttgacctcagctcattcaatggca<br/>         tagagagttagtgctgaggagctggagctcatttagaggaacacagctgctgtgactgtcattttgtctggc<br/>         atagcttcttctctgttcagaaaagacctctgttattgtagtaactctgggtgagtttctgattcacaatga<br/>         actcagaggcgaatgactggcaggtttaaagtagagtaataatcagatttattgtatgtaccatcat</p> |

|      |                                   |      |                                                                                                                                                                                                                                                                                                                                                                                                                                                                                                                                                                                                                                                                                                                                                                                                                                                                                                                                                                                                                                                                                                                                                                                                                                                                                                                                                                                                                                                                                                                                                                                                                                                                |
|------|-----------------------------------|------|----------------------------------------------------------------------------------------------------------------------------------------------------------------------------------------------------------------------------------------------------------------------------------------------------------------------------------------------------------------------------------------------------------------------------------------------------------------------------------------------------------------------------------------------------------------------------------------------------------------------------------------------------------------------------------------------------------------------------------------------------------------------------------------------------------------------------------------------------------------------------------------------------------------------------------------------------------------------------------------------------------------------------------------------------------------------------------------------------------------------------------------------------------------------------------------------------------------------------------------------------------------------------------------------------------------------------------------------------------------------------------------------------------------------------------------------------------------------------------------------------------------------------------------------------------------------------------------------------------------------------------------------------------------|
| HA-R | chr5:29,312,901-29,314,496 (mm10) | 1596 | <p>ttagtaaggtgcatalgtgaggactaattacatctctggctatgctgtttgcttttggccaccctcttagtatccgtgtg<br/> gtgtatgtgaggaggttaattacataltttagttacactgctgggtttgtgggtgatitggittgttacatcactcagctt<br/> tcaggcactatgggtctttgatcctcagagfataatgtaattttctctgtacclataaagaataagggtttctacat<br/> ataaggctaaatgtctcttattgaaataaatgagtttggactcaagtcagactcctctactctgtgctcagat<br/> atatttcaagagfcttctggaagctgctgcccctcactggttggtaacatgccaagtgctggggagcacagtt<br/> atgtttaggttccacgtgtctagtataagggttgaatgagacatcaggaggtgtgtgagcattacttttcacacca<br/> tagcccaggaaactgtatgtagtcaggtaggggcatacacgtgtaattgcagcagttgggcagctgaaggaggt<br/> gcaaggaltcggctagctgtatcacaaggtatgaagccaggtctcaggtgattgtatgcalggggcactttgtgat<br/> ctctctgaaatataaggctgttttattgaaaaagtcagatcataaaagatgggctgtgctgtttcatagggaacca<br/> acctcaggctcattaaaggatgatgaaatcaactcctgaatactcatagtcagctctgttaagtgagaag<br/> agctttatgagggaagaaaaaaagctactagcttcaattgaaagcaatagcttttaattaccatgctccaatgct<br/> tacattcagaaaaactcttagaataatcattactaataaaacttcccctagtttttgggtgagtcagggggga<br/> gaattgaaaactatctacttttaggttaaaatgaaatttcttgcagtgagggttagatgcalattaaatgctgctggagg<br/> ttcttaggtacagctcagaccgactggatgactcaccataccctatgcagtttgagttgagatctgtctatttgg<br/> catttaactcatalgcactgcctataaaatcattgtcagatgttgcctgtagcaatttcagtgctgtaaatatta<br/> gcaatgactctgtgaaactcacacagctgaaactgtctggctgaaactggtgcagcatattactgacagccattatg<br/> tagttgtatcccaggaatagaagtgacagtgaggactttgacagcttagtataagtgccatcgaagttgtgatgac<br/> tattccagtcactgactatgacaccctcagacagcctctgtgcacacctcaattaaaagaaaacttagacttaata<br/> aaactgcagtgatgaaatttaaacagcagacataataaacacacatgtgtatctcttagtggttaaagtaagatc<br/> agcaggtaaaaactgaaaaaaggggtgcattataactaa</p> |
|------|-----------------------------------|------|----------------------------------------------------------------------------------------------------------------------------------------------------------------------------------------------------------------------------------------------------------------------------------------------------------------------------------------------------------------------------------------------------------------------------------------------------------------------------------------------------------------------------------------------------------------------------------------------------------------------------------------------------------------------------------------------------------------------------------------------------------------------------------------------------------------------------------------------------------------------------------------------------------------------------------------------------------------------------------------------------------------------------------------------------------------------------------------------------------------------------------------------------------------------------------------------------------------------------------------------------------------------------------------------------------------------------------------------------------------------------------------------------------------------------------------------------------------------------------------------------------------------------------------------------------------------------------------------------------------------------------------------------------------|

**Table S4. Significance testing for evolutionary rates (Permutation test), Related to**

**Figure 2**

| # | Alternative hypothesis                                                                     | Sample size    |                | p-value |
|---|--------------------------------------------------------------------------------------------|----------------|----------------|---------|
|   |                                                                                            | N <sub>1</sub> | N <sub>2</sub> |         |
| 1 | ZRS evolves faster than forebrain-specific enhancers in advanced snakes                    | 1              | 83             | 0.012   |
| 2 | ZRS evolves faster than forebrain-specific enhancers in basal snakes                       | 1              | 83             | n.s.    |
| 3 | ZRS evolves faster than forebrain-specific enhancers in lizards                            | 1              | 78             | n.s.    |
| 4 | Limb specific enhancers evolve faster than forebrain-specific enhancers in advanced snakes | 35             | 83             | n.s.    |



**Table S5. Representative transcription factor motifs that show increase in relative substitution rate in snakes compared to non-snake species, Related to Figure 5**

| Motif name    | Motif                                                                             | FDR    |
|---------------|-----------------------------------------------------------------------------------|--------|
| ETS1          |  | 0.0055 |
| Homeodomain 1 |  | 0.0110 |
| Homeodomain 2 |  | 0.0385 |

**Table S6. Primers used in the study, Related to Figure 3**

| Primer name | Species        | Primer sequence               |
|-------------|----------------|-------------------------------|
| T7Cas9_F    | N/A            | TAATACGACTCACTATAGGGAGACCC    |
| PolyACas9_R | N/A            | CCATAGAGCCCACCGCAT            |
| E1          | N/A            | CGAAACACCTAATACGACTCACTATAGGG |
| E2          | N/A            | AAAAGCACCGACTCGGTGCC          |
| F           | mouse          | TGTCTGCCCATGAGTTTGT           |
| R           | mouse          | GTGCCTGAAAGCTGAGTGATGTA       |
| left-F      | mouse          | GGTAGAGGCCAGGAAGTCG           |
| right-R     | mouse          | GCTGCTTATAGAATTTAAGGCTCA      |
| left-R-H    | human          | CAGCACAGAACTCTTCGCTTC         |
| right-F-H   | human          | CCAGACATCCCTGAATGGC           |
| left-R-C    | coelacanth     | ACCAGCCAAACCGAGAAG            |
| right-F-C   | coelacanth     | GCAGAGTCTGCAGGATTTAGGA        |
| left-R-P    | Burmese python | ATGAAGCGTCCTCGAGACATA         |
| right-F-P   | Burmese python | AGCACAATGGAGGAGGAACA          |
| left-R-KC   | king cobra     | CTTGATAAGAAGCGAAACGA          |
| right-F-KC  | king cobra     | AGATATGAATGGGAAGTCTTTGG       |
